# Supplementary material for: Mechanical and optical behaviors: strain synergy effects in high temperature phase oxides of lead
Source: Royal Society of Chemistry journal article supplement (doi:10.1039/d1nj03885k), 2021-01-01
Supplement: d1nj03885k1.pdf [file d1nj03885k1.pdf]

## Supporting Information

### Mechanical and optical behaviors: strain synergy effects in high temperature phase oxide of lead

Qidong Kang<sup>1,#</sup>, Fei Yang<sup>1,#</sup>, Xinyu Zhang<sup>1</sup>, Ziyu Hu<sup>1\*</sup>,

<sup>1</sup> College of Mathematics and Physics, Beijing University of Chemical Technology, Beijing, 100029, People's Republic of China

\*Correspondence and requests for materials should be addressed to Z. Y. Hu  
([huziyu@mail.buct.edu.cn](mailto:huziyu@mail.buct.edu.cn))

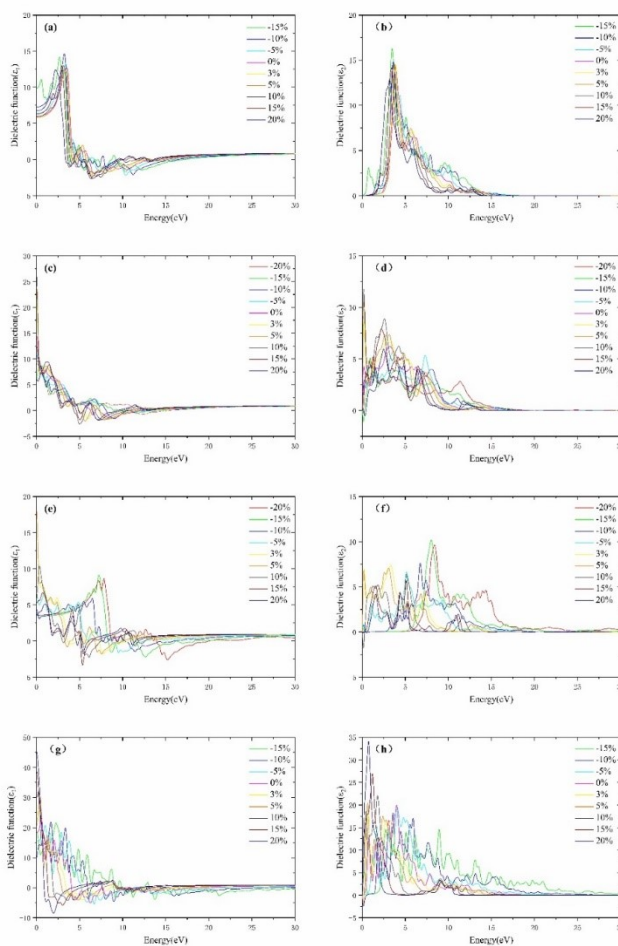

Fig.S1. Real  $\epsilon_1(\omega)$  (a) and imaginary  $\epsilon_2(\omega)$  (b) components of the dielectric function of the  $\alpha$ -PbO under strain in the range of -15%-+20%; Real  $\epsilon_1(\omega)$  (c) and imaginary  $\epsilon_2(\omega)$  (d) components of the dielectric function of the  $\alpha$ -PbO<sub>2</sub> under strain in the range of -20%-+20%; Real  $\epsilon_1(\omega)$  (e) and imaginary  $\epsilon_2(\omega)$  (f) components of the dielectric function of the  $\beta$ -PbO<sub>2</sub> under strain in the range of -20%-+20%; Real  $\epsilon_1(\omega)$  (g) and imaginary  $\epsilon_2(\omega)$  (h) components of the dielectric function of the CsCl-PbO under strain in the range of -15%-+20%.
